# Supplementary material for: CzcR-dependent reduction of catalase gene expression and induction of catalase activity in Pseudomonas aeruginosa during zinc excess
Source: PubMed Central journal article supplement — BMC Microbiol. 2024 Nov 29;24:509. doi: 10.1186/s12866-024-03671-0 (PMC11606100; doi:10.1186/s12866-024-03671-0), 2024-11-29
Supplement: 12866_2024_3671_MOESM1_ESM.pdf [file 12866_2024_3671_MOESM1_ESM.pdf]

## Supplementary Material:

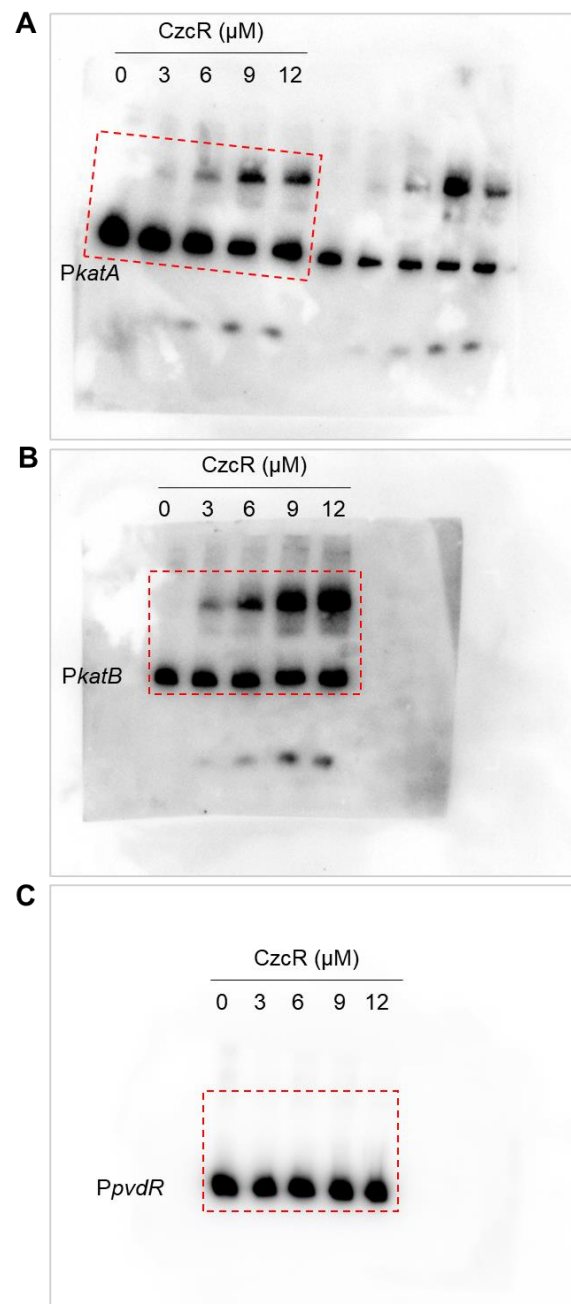

**Figure S1. Unprocessed gel images of the EMSA results in Figure 4C. Gel images shown in Figure 4C were indicated by the dashed red box.**
